# Supplementary material for: Tracking particles with large displacements using energy minimization
Source: Royal Society of Chemistry journal article supplement (doi:10.1039/c6sm02011a), 2017-01-01
Supplement: c6sm02011a1.zip [file c6sm02011a1.zip]

## Purpose:

*Tracker.m* is a function that assigns particle identifications in 2 frames based on a 'diffusion tracker' (minimizing squared displacements) or a 'strain tracker' (minimizing stored/dissipated energy).

## Making sure *Tracker.m* is fast

Please note that the performance of the function is improved tremendously by compiling *assignmentoptimal.c* which is included in the main folder. To compile, run:

```
>> mex assignmentoptimal.c
```

You can check that MATLAB is running the compiled version by running:

```
>> which assignmentoptimal
```

and checking that the result is a compiled file and not a .m file.

## What you need for *Tracker.m* to work

You will need the following functions in your folder:

- (1) *Tracker.m*
- (2) *assignmentoptimal.m*
- (3) *assignmentoptimal.c*

*Tracker.m* is included in the main folder. Although both *assignmentoptimal.m* and *assignmentoptimal.c* are also in the main folder, they can be found here: <http://www.mathworks.com/matlabcentral/fileexchange/6543>

## Finding Examples

Examples of how to use *Tracker.m* can be found in the Example folder. The folder contains the following:

- (1) *Example.m* – a script that allows one to test *Tracker.m* on examples of simulated and real data of diffusion and material deformation.
- (2) *xyt\_diff.mat* – an array of particle positions at two time points corresponding a simulation of diffusion.
- (3) *xyt\_trans.mat* – an array of particle positions at two time points corresponding a simulation of translation.
- (4) *xyt\_stretch.mat* – an array of particle positions at two time points corresponding a simulation of pure stretch.
- (5) *xyt\_shear.mat* – an array of particle positions at two time points corresponding a simulation of shear.

- (6) *xyt\_tfm.mat* – an array of particle positions at two time points corresponding to substrate deformations due to cell traction forces, as used in traction force microscopy (TFM).
- (7) *trck2dsp.m* – a function that reformats the output of *Tracker.m* into a more convenient structure.

The example can be run immediately (after compiling *assignmentoptimal.c* to improve speed). The data type can be changed by the user in line 95 and the parameters used in *Tracker.m* can be modified in the lines following it.
